# Supplementary material
Source: Research Square preprint supplement (doi:10.21203/rs.3.rs-9954680/v1)
Supplement: Supplementary file 1 [file fe560c9d32d85ed254f3e200.docx]

# **Supplementary data**

## **Supplementary figures.**


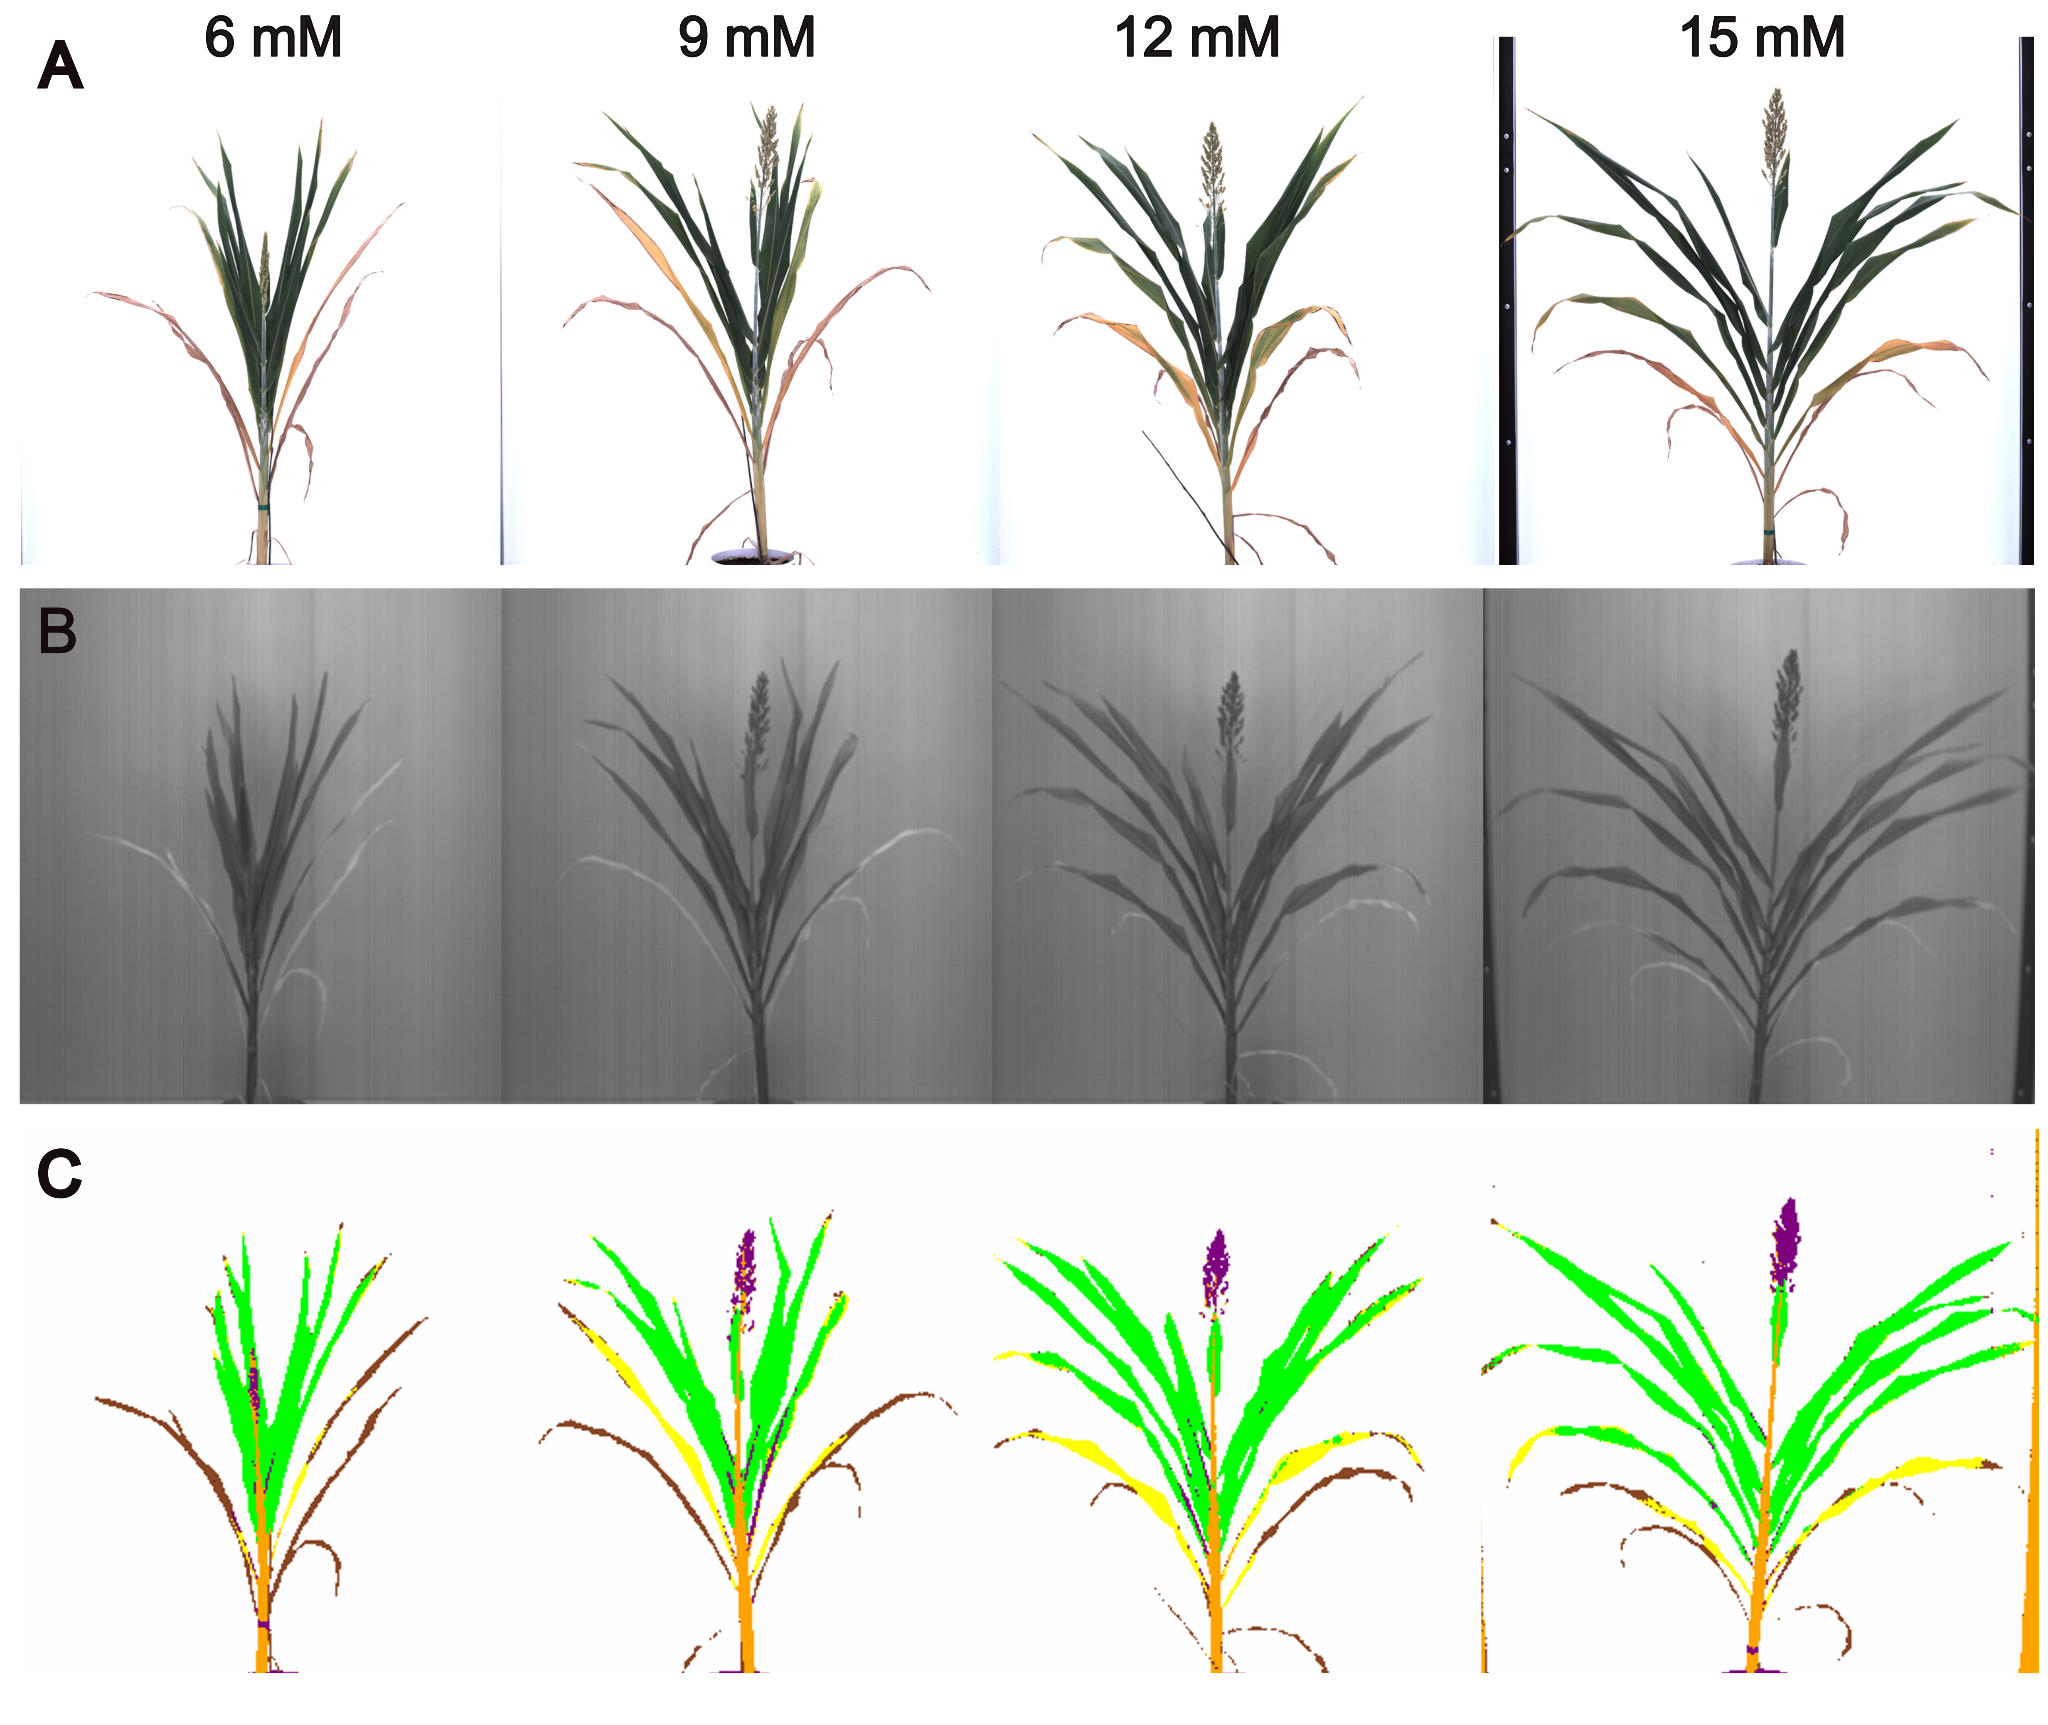


**Figure S1**. (A) RGB Images of Tx430 plants grown in soil with four N levels: 6 mM, 9 mM, 12 mM, and 15 mM, taken at 99 DAP. (B) Hyperspectral images of the same plants, taken on the same day. (C) Tissues segmented by the SVM model (segmentation classes: green leaf (green), yellow leaf (yellow), dried leaf (brown), stalk (orange), panicle (purple) and background (white)).

##
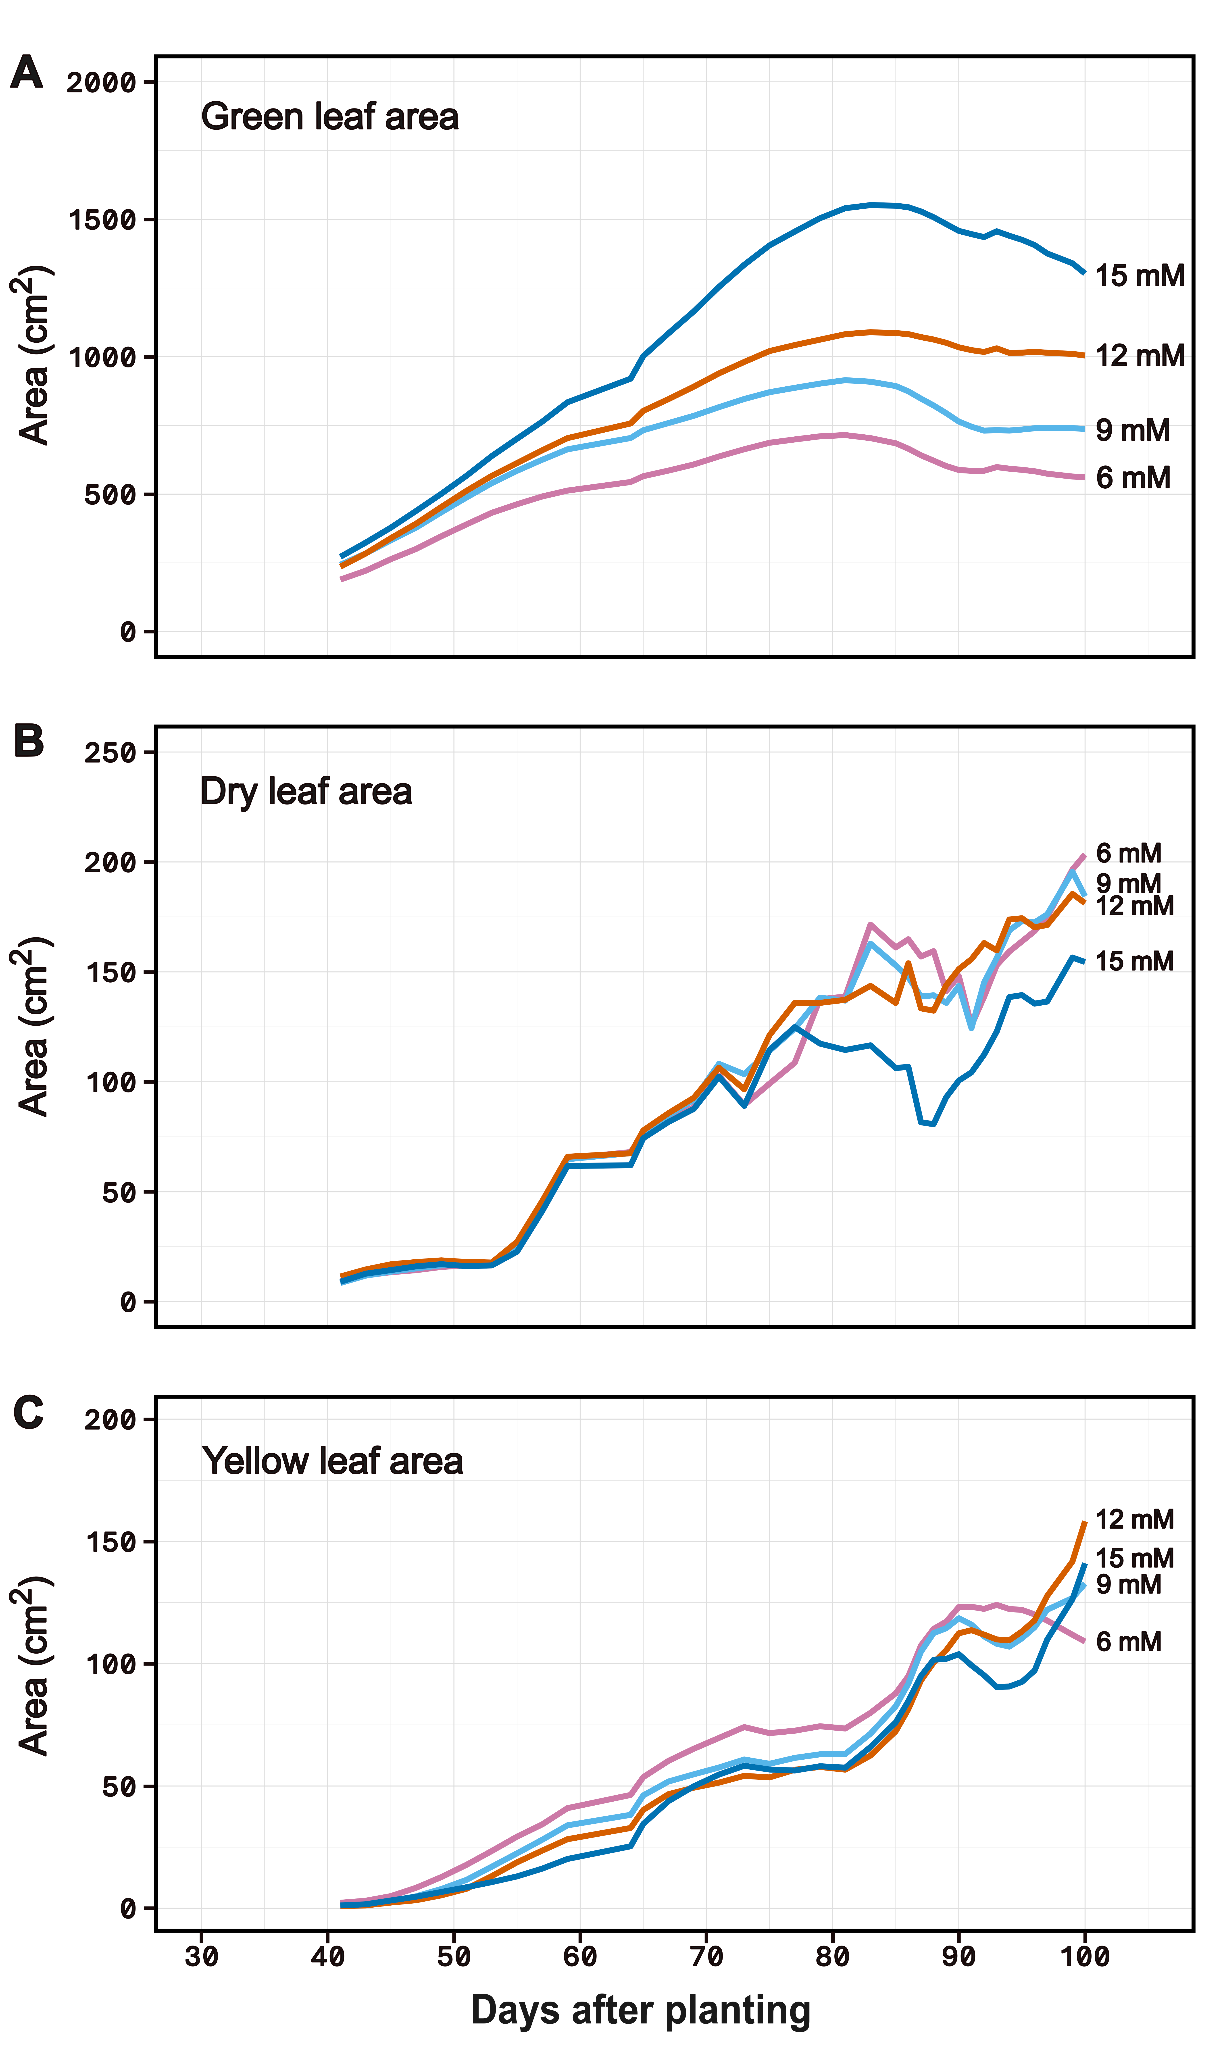


**Figure S2**. Area of (A) green, (B) dry, and (C) yellow leaves derived from Tx430 plants grown under four N treatments: 6 mM, 9 mM, 12 mM, and 15 mM. Hyperspectral images were taken between 29 to 100 DAP. The calculated areas are the mean of five biological replicates per treatment.


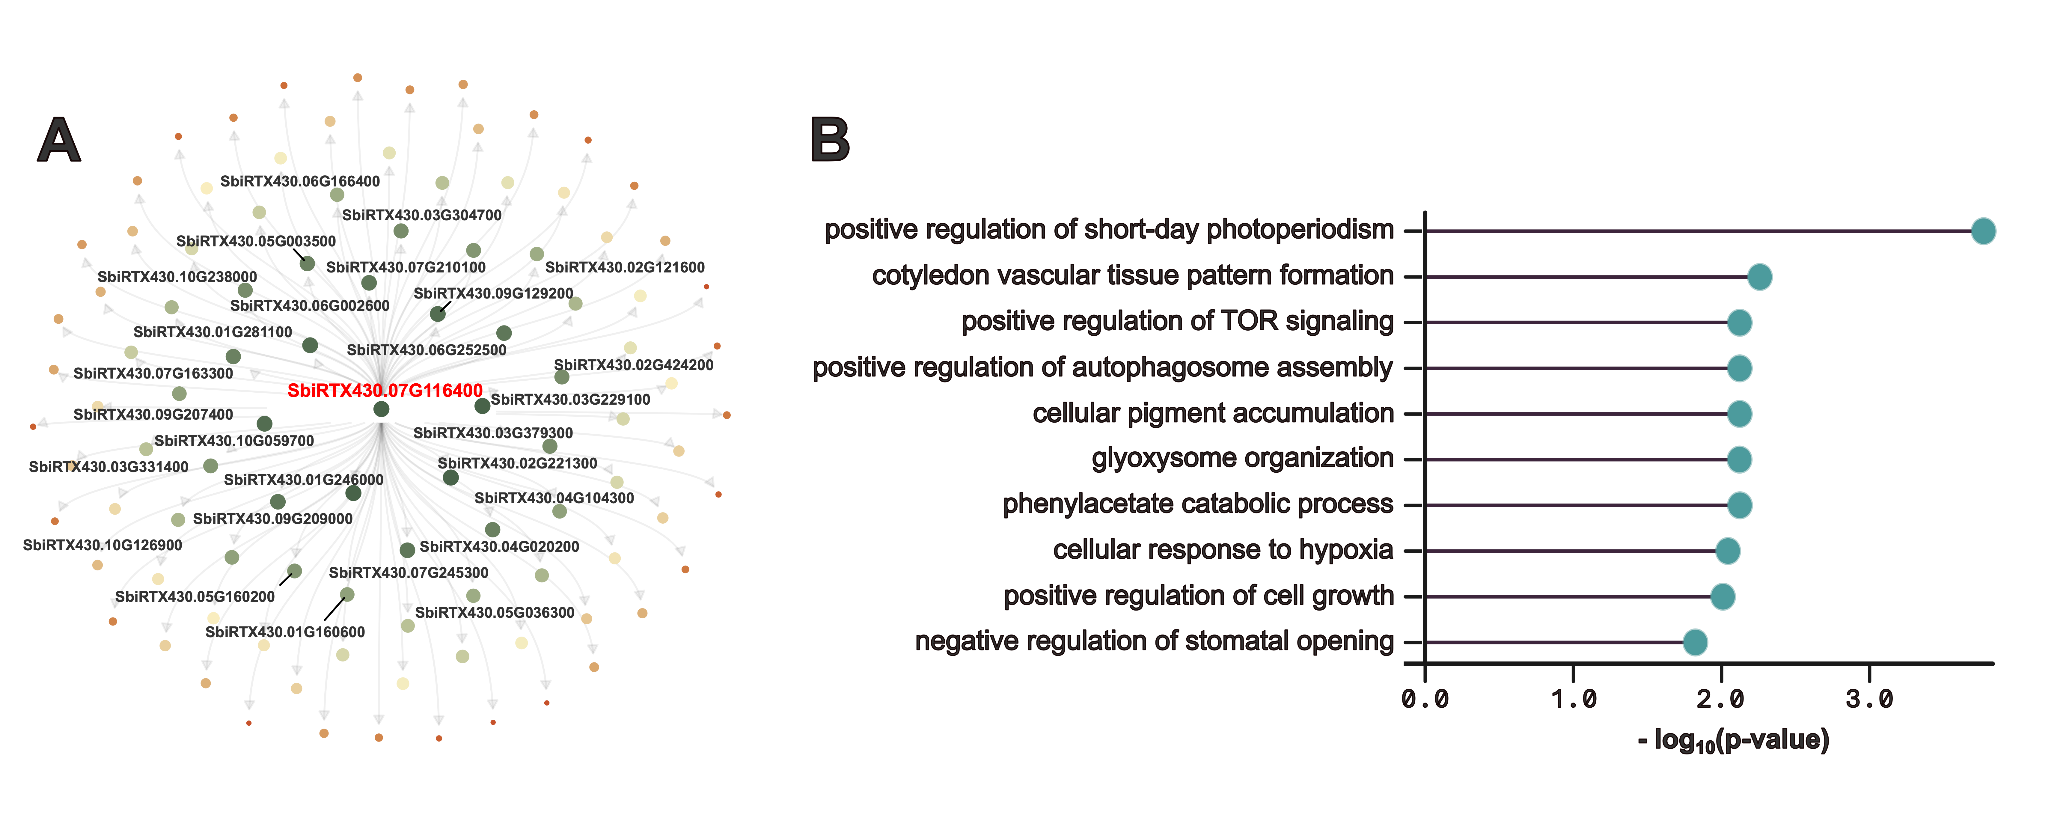


**Figure S3**. Correlation between senescence and gene expression under variable nitrogen levels. (A) Gene regulatory network of SbiRTX430.07G116400, a senescence-associated transcription factor derived from the top 100 genes highly correlated with senescence ratio. (B) Enriched Gene Ontology (GO) terms among genes in the regulatory network from panel (A).

##

## **Supplementary Tables.**

**Table S1**. Composition of nutrients in Hoagland solution used for nitrogen treatments.

| **Nutrient stock** | **6 mM N (vol. in mL)** | **9 mM N**  **(vol. in mL)** | **12 mM N**  **(vol. in mL)** | **15 mM N**  **(vol. in mL)** |
| --- | --- | --- | --- | --- |
| 2 M KNO3 | 1 | 1.5 | 2 | 2.5 |
| 2 M Ca(NO3)2⸱4H2O | 1 | 1.5 | 2 | 2.5 |
| 1 M KH2PO4 (pH 6.0) | 1 | 1 | 1 | 1 |
| 2 M MgSO4⸱7H2O | 1 | 1 | 1 | 1 |
| 0.05 M Fe-EDTA | 1 | 1 | 1 | 1 |
| 0.5 M K2SO4 | 4 | 2 | 1 | - |
| 2 M CaCl2⸱2H2O | 2 | 1 | 0.5 | - |
| **Standard Hoagland micronutrient stock** | 1 | 1 | 1 | 1 |
| Water | Up to 1000 mL | | | |

**Table S2.** Sorghum plants used for pixel collection in Zooniverse, a total of 74 plants on the last day of imaging, September 19th, 2019 (100 DAP).

| **Plant number** | **Nitrogen level** | **Variety** | **Plant number** | **Nitrogen level** | **Variety** |
| --- | --- | --- | --- | --- | --- |
| 340 | 6 mM | ACME | 399 | 12 mM | P898012 |
| 344 | 6 mM | SC500 | 401 | 12 mM | ACME |
| 345 | 6 mM | SC301 | 414 | 12 mM | SC301 |
| 347 | 6 mM | 90M | 415 | 12 mM | 90M |
| 348 | 6 mM | SC1439 | 416 | 12 mM | P850029 |
| 350 | 6 mM | P898012 | 417 | 12 mM | SC85 |
| 351 | 6 mM | P850029 | 419 | 12 mM | P898012 |
| 352 | 6 mM | SC301 | 422 | 12 mM | SC85 |
| 353 | 6 mM | SC500 | 423 | 12 mM | 90M |
| 354 | 6 mM | ACME | 424 | 12 mM | SC301 |
| 357 | 6 mM | ACME | 425 | 12 mM | P898012 |
| 358 | 6 mM | 90M | 426 | 12 mM | SC1439 |
| 359 | 6 mM | SC1439 | 427 | 12 mM | SC500 |
| 360 | 6 mM | P898012 | 429 | 12 mM | ACME |
| 361 | 6 mM | P850029 | 430 | 12 mM | SC85 |
| 362 | 6 mM | SC85 | 431 | 12 mM | SC500 |
| 363 | 6 mM | SC500 | 432 | 12 mM | P850029 |
| 365 | 6 mM | SC500 | 435 | 12 mM | 90M |
| 366 | 6 mM | SC85 | 437 | 12 mM | SC301 |
| 368 | 6 mM | P898012 | 438 | 12 mM | ACME |
| 369 | 6 mM | SC301 | 454 | 6 mM | Tx430 |
| 370 | 6 mM | SC1439 | 455 | 6 mM | Tx430 |
| 371 | 6 mM | 90M | 456 | 6 mM | Tx430 |
| 372 | 6 mM | P850029 | 457 | 6 mM | Tx430 |
| 373 | 6 mM | ACME | 458 | 6 mM | Tx430 |
| 374 | 6 mM | ACME | 459 | 9 mM | Tx430 |
| 375 | 6 mM | P898012 | 460 | 9 mM | Tx430 |
| 376 | 6 mM | SC85 | 461 | 9 mM | Tx430 |
| 377 | 6 mM | 90M | 462 | 9 mM | Tx430 |
| 379 | 6 mM | SC301 | 463 | 9 mM | Tx430 |
| 380 | 6 mM | SC500 | 464 | 12 mM | Tx430 |
| 382 | 6 mM | SC1439 | 465 | 12 mM | Tx430 |
| 393 | 12 mM | SC301 | 466 | 12 mM | Tx430 |
| 394 | 12 mM | SC1439 | 467 | 12 mM | Tx430 |
| 395 | 12 mM | P850029 | 468 | 12 mM | Tx430 |
| 396 | 12 mM | 90M | 469 | 15 mM | Tx430 |
| 397 | 12 mM | SC85 | 472 | 15 mM | Tx430 |

**Table S3**. The number of pixels in each of the six pixel classes within the training dataset.

| Pixel class | Number of pixels |
| --- | --- |
| Background | 2,746 |
| Green leaf | 1,406 |
| Panicle | 796 |
| Stalk | 1,305 |
| Yellow leaf | 1,162 |
| Dry leaf | 1,372 |
